# Supplementary material for: A Validated Ultrasound-Assisted Extraction Coupled with SPE-HPLC-DAD for the Determination of Flavonoids in By-Products of Plant Origin: An Application Study for the Valorization of the Walnut Septum Membrane
Source: MDPI journal article supplement (doi:10.3390/molecules26216418), 2021-10-24
Supplement: s1 [file s1]

## **Supplementary Material**

A validated Ultrasound-Assisted Extraction coupled with SPE-HPLC-DAD for the Determination of Flavonoids in by-Products of Plant Origin: An Application Study for the Valorization of the Walnut Septum Membrane

Natasa P. Kalogiouri and Victoria F. Samanidou

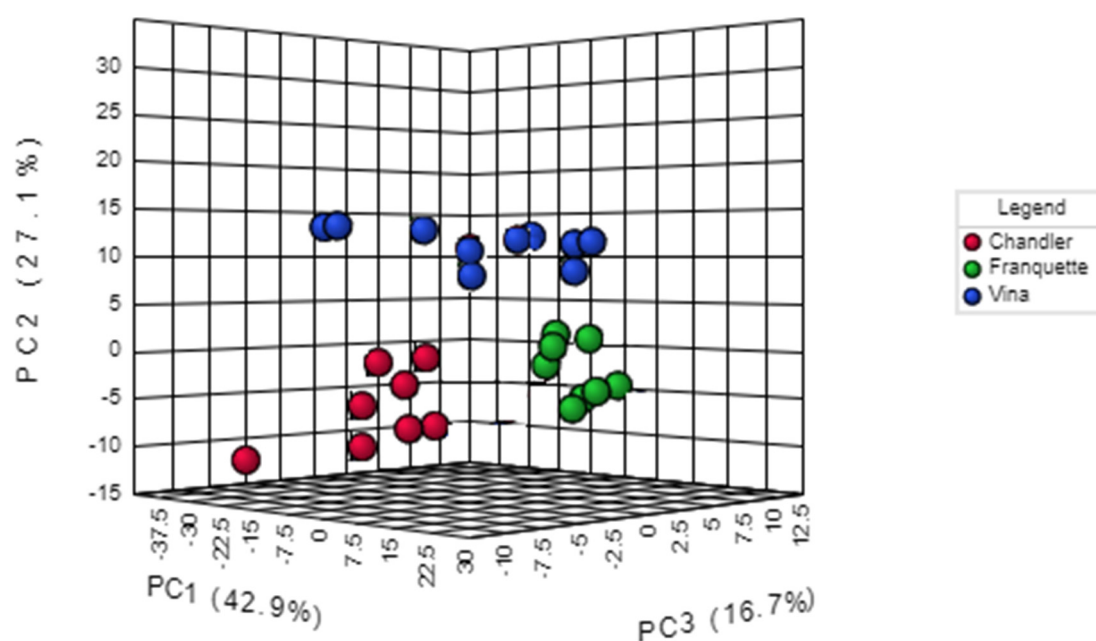

**Figure S1.** PCA 3D score plot in color presenting pairwise correlation between PCs in the clustering between walnut septa belonging to Chandler, Vina, and Franquette variety.

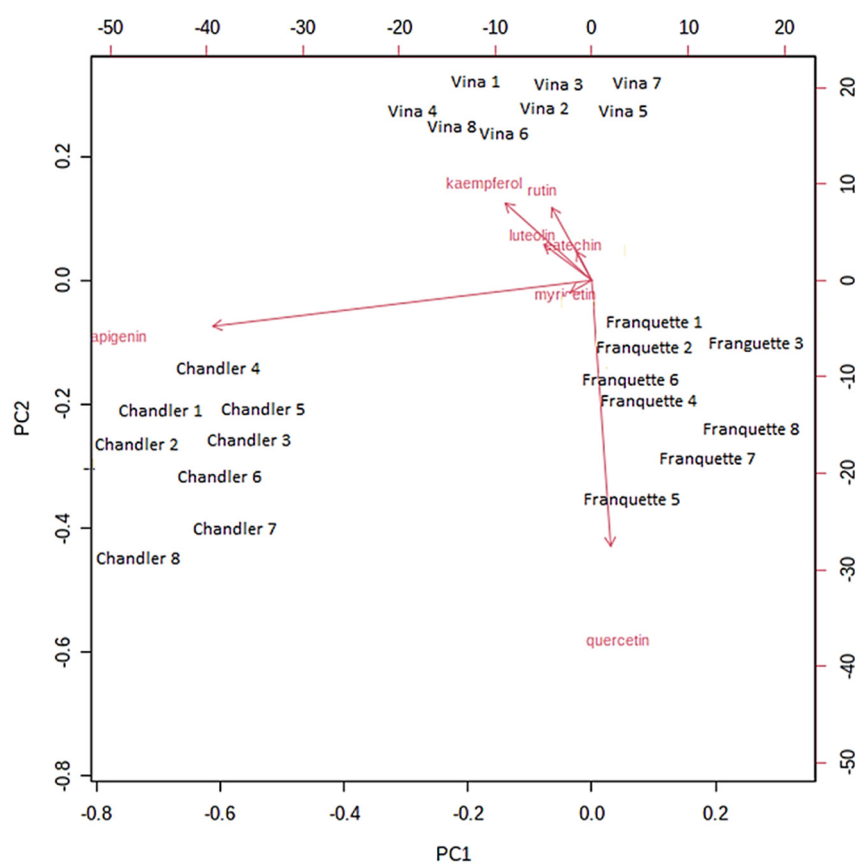

**Figure S2.** PCA loading plot showing the projection of the data set in PC1 x PC2 plane.
